# Supplementary material
Source: PubMed Central journal article supplement (PMC2822385)
Supplement: NIHMS166249-supplement-supplement_1.pdf [file NIHMS166249-supplement-supplement_1.pdf]

Table E1  
Exposure-response models for all 48 pesticides and atopic and non-atopic models using tertiles of intensity-adjusted exposure (0, <median, median+)

| Exposure              | Controls<br>(N=19263)<br>n | %     | Atopic asthma (N=127) |     |             |                |      | p-trend | Non-atopic asthma (N=314) |    |             |                         |      | p-trend |
|-----------------------|----------------------------|-------|-----------------------|-----|-------------|----------------|------|---------|---------------------------|----|-------------|-------------------------|------|---------|
|                       |                            |       | n                     | %   | Odds Ratio* | 95% Confidence |      |         | n                         | %  | Odds Ratio* | 95% Confidence Interval |      |         |
| Herbicides<br>2,4,5-T | 0                          | 15312 | 82                    | 86  | 72          |                |      | 218     | 72                        |    |             |                         | 0.31 |         |
|                       | 1-72                       | 1733  | 9                     | 11  | 9           | 0.86           | 0.46 | 1.64    | 43                        | 14 | 1.22        | 0.87                    | 1.72 |         |
|                       | 72+                        | 1693  | 9                     | 23  | 19          | 1.83           | 1.14 | 2.96    | 40                        | 13 | 1.14        | 0.80                    | 1.61 |         |
| 2,4,5-TP              | 0                          | 17860 | 95                    | 109 | 91          |                |      |         | 281                       | 93 |             |                         |      | 0.41    |
|                       | 1-84                       | 437   | 2                     | 3   | 3           | 0.93           | 0.29 | 2.96    | 10                        | 3  | 1.16        | 0.61                    | 2.20 |         |
|                       | 84+                        | 437   | 2                     | 8   | 7           | 2.51           | 1.21 | 5.21    | 11                        | 4  | 1.26        | 0.68                    | 2.32 |         |
| 2,4-D                 | 0                          | 4004  | 21                    | 16  | 13          |                |      |         | 48                        | 16 |             |                         |      | 0.52    |
|                       | 1-368                      | 7194  | 38                    | 41  | 34          | 1.32           | 0.73 | 2.37    | 116                       | 38 | 1.20        | 0.85                    | 1.70 |         |
|                       | 368+                       | 7533  | 40                    | 65  | 53          | 1.74           | 0.98 | 3.09    | 140                       | 46 | 1.16        | 0.82                    | 1.65 |         |
| Alachlor              | 0                          | 8001  | 45                    | 52  | 44          |                |      |         | 109                       | 38 |             |                         |      | 0.33    |
|                       | 1-240                      | 5125  | 29                    | 33  | 28          | 0.89           | 0.57 | 1.40    | 93                        | 33 | 1.19        | 0.89                    | 1.58 |         |
|                       | 240+                       | 4722  | 27                    | 34  | 29          | 0.99           | 0.64 | 1.54    | 82                        | 29 | 1.15        | 0.85                    | 1.54 |         |
| Atrazine              | 0                          | 5125  | 27                    | 32  | 26          |                |      |         | 69                        | 23 |             |                         |      | 0.66    |
|                       | 1-329                      | 7089  | 38                    | 38  | 31          | 0.78           | 0.48 | 1.28    | 121                       | 40 | 1.16        | 0.85                    | 1.58 |         |
|                       | 329+                       | 6687  | 35                    | 54  | 44          | 1.12           | 0.71 | 1.76    | 116                       | 38 | 1.10        | 0.80                    | 1.50 |         |
| Butylate              | 0                          | 13828 | 74                    | 84  | 68          |                |      |         | 211                       | 70 |             |                         |      | 0.81    |
|                       | 1-137                      | 2466  | 13                    | 21  | 17          | 1.26           | 0.77 | 2.06    | 55                        | 18 | 1.28        | 0.94                    | 1.74 |         |
|                       | 137+                       | 2463  | 13                    | 19  | 15          | 1.16           | 0.69 | 1.93    | 36                        | 12 | 0.85        | 0.59                    | 1.23 |         |
| Chlorimuron-Ethyl     | 0                          | 12823 | 68                    | 81  | 64          |                |      |         | 208                       | 68 |             |                         |      | 0.85    |
|                       | 1-58                       | 3027  | 16                    | 27  | 21          | 1.47           | 0.94 | 2.30    | 52                        | 17 | 1.11        | 0.81                    | 1.52 |         |
|                       | 58+                        | 2936  | 16                    | 18  | 14          | 1.02           | 0.61 | 1.71    | 44                        | 15 | 1.00        | 0.72                    | 1.39 |         |
| Cyanazine             | 0                          | 10323 | 57                    | 61  | 52          |                |      |         | 142                       | 49 |             |                         |      | 0.13    |
|                       | 1-165                      | 3986  | 22                    | 27  | 23          | 1.04           | 0.64 | 1.68    | 78                        | 27 | 1.28        | 0.95                    | 1.72 |         |
|                       | 165+                       | 3683  | 21                    | 30  | 25          | 1.24           | 0.77 | 1.99    | 70                        | 24 | 1.25        | 0.91                    | 1.70 |         |

| Exposure      | Controls<br>(N=19263)<br>n | %     | Atopic asthma (N=127) |     |             |                |      | p-trend | Non-atopic asthma (N=314) |    |             |                         |      | p-trend |
|---------------|----------------------------|-------|-----------------------|-----|-------------|----------------|------|---------|---------------------------|----|-------------|-------------------------|------|---------|
|               |                            |       | n                     | %   | Odds Ratio* | 95% Confidence |      |         | n                         | %  | Odds Ratio* | 95% Confidence Interval |      |         |
| Dicamba       | 0                          | 48    | 50                    | 42. | .           | .              | 0.59 | 113     | 40.                       | .  | .           |                         | 0.25 |         |
|               | 1-166                      | 4867  | 27                    | 38  | 32          | 1.29           | 0.81 | 2.07    | 94                        | 33 | 1.41        | 1.03                    | 1.92 |         |
|               | 166+                       | 4484  | 25                    | 32  | 27          | 1.14           | 0.69 | 1.88    | 77                        | 27 | 1.21        | 0.87                    | 1.68 |         |
| EPTC          | 0                          | 80    | 84                    | 71. | .           | .              | 0.02 | 213     | 75.                       | .  | .           |                         | 0.24 |         |
|               | 1-96                       | 1828  | 10                    | 16  | 14          | 1.45           | 0.83 | 2.52    | 41                        | 15 | 1.41        | 1.00                    | 2.00 |         |
|               | 96+                        | 1676  | 9                     | 18  | 15          | 1.80           | 1.06 | 3.04    | 29                        | 10 | 1.12        | 0.75                    | 1.68 |         |
| Glyphosate    | 0                          | 4361  | 23                    | 23  | 18.         | .              | 0.08 | 67      | 22.                       | .  | .           |                         | 0.62 |         |
|               | 1-179                      | 7320  | 39                    | 46  | 37          | 1.22           | 0.74 | 2.03    | 128                       | 41 | 1.19        | 0.88                    | 1.61 |         |
|               | 179+                       | 7172  | 38                    | 56  | 45          | 1.53           | 0.93 | 2.52    | 114                       | 37 | 1.11        | 0.81                    | 1.51 |         |
| Imazethapyr   | 0                          | 9992  | 56                    | 65  | 56.         | .              | 0.56 | 165     | 58.                       | .  | .           |                         | 0.23 |         |
|               | 1-95                       | 4153  | 23                    | 23  | 20          | 0.84           | 0.50 | 1.41    | 70                        | 24 | 0.95        | 0.70                    | 1.29 |         |
|               | 95+                        | 3700  | 21                    | 29  | 25          | 1.19           | 0.73 | 1.93    | 52                        | 18 | 0.81        | 0.58                    | 1.13 |         |
| Metolachlor   | 0                          | 9559  | 53                    | 63  | 53.         | .              | 0.46 | 142     | 50.                       | .  | .           |                         | 0.54 |         |
|               | 1-204                      | 4368  | 24                    | 21  | 18          | 0.71           | 0.43 | 1.18    | 80                        | 28 | 1.19        | 0.89                    | 1.58 |         |
|               | 204+                       | 4053  | 23                    | 34  | 29          | 1.25           | 0.81 | 1.92    | 65                        | 23 | 1.07        | 0.79                    | 1.45 |         |
| Metribuzin    | 0                          | 11715 | 63                    | 69  | 57.         | .              | 0.40 | 179     | 59.                       | .  | .           |                         | 0.69 |         |
|               | 1-85                       | 3512  | 19                    | 25  | 21          | 1.09           | 0.68 | 1.77    | 67                        | 22 | 1.09        | 0.81                    | 1.46 |         |
|               | 85+                        | 3491  | 19                    | 28  | 23          | 1.22           | 0.77 | 1.94    | 56                        | 19 | 0.92        | 0.67                    | 1.26 |         |
| Paraquat      | 0                          | 15846 | 84                    | 97  | 78.         | .              | 0.08 | 263     | 88.                       | .  | .           |                         | 0.25 |         |
|               | 1-79                       | 1476  | 8                     | 16  | 13          | 1.88           | 1.09 | 3.24    | 20                        | 7  | 0.83        | 0.52                    | 1.33 |         |
|               | 79+                        | 1472  | 8                     | 11  | 9           | 1.46           | 0.73 | 2.89    | 17                        | 6  | 0.77        | 0.46                    | 1.30 |         |
| Pendimethalin | 0                          | 11860 | 63                    | 81  | 65.         | .              | 0.71 | 187     | 61.                       | .  | .           |                         | 0.59 |         |
|               | 1-99                       | 3428  | 18                    | 23  | 19          | 0.97           | 0.61 | 1.55    | 70                        | 23 | 1.30        | 0.98                    | 1.72 |         |
|               | 99+                        | 3476  | 19                    | 20  | 16          | 0.91           | 0.55 | 1.49    | 48                        | 16 | 0.99        | 0.72                    | 1.38 |         |
| Petroleum Oil | 0                          | 14874 | 80                    | 91  | 73.         | .              | 0.51 | 220     | 73.                       | .  | .           |                         | 0.09 |         |
|               | 1-154                      | 1899  | 10                    | 21  | 17          | 1.71           | 1.06 | 2.77    | 47                        | 16 | 1.57        | 1.14                    | 2.17 |         |
|               | 154+                       | 1891  | 10                    | 12  | 10          | 0.96           | 0.52 | 1.76    | 35                        | 12 | 1.17        | 0.81                    | 1.69 |         |
| Trifluralin   | 0                          | 8240  | 46                    | 56  | 49.         | .              | 0.70 | 132     | 45.                       | .  | .           |                         | 0.13 |         |
|               | 1-306                      | 4875  | 27                    | 23  | 20          | 0.62           | 0.38 | 1.03    | 88                        | 30 | 1.01        | 0.76                    | 1.34 |         |
|               | 306+                       | 4800  | 27                    | 36  | 31          | 0.94           | 0.60 | 1.47    | 71                        | 24 | 0.78        | 0.57                    | 1.06 |         |

| Exposure               | Controls<br>(N=19263) | Atopic asthma (N=127) |    |             |                |         | p-trend | Non-atopic asthma (N=314) |      |             |                         |      | p-trend |
|------------------------|-----------------------|-----------------------|----|-------------|----------------|---------|---------|---------------------------|------|-------------|-------------------------|------|---------|
|                        |                       | n                     | %  | Odds Ratio* | 95% Confidence | p-trend |         | n                         | %    | Odds Ratio* | 95% Confidence Interval |      |         |
| <b>Insecticides</b>    |                       |                       |    |             |                |         |         |                           |      |             |                         |      |         |
| <b>Carbamates</b>      |                       |                       |    |             |                |         |         |                           |      |             |                         |      |         |
| Aldicarb               | 0                     | 17330                 | 92 | 117         | 94             |         | 293     | 96                        |      |             |                         | 0.23 |         |
|                        | 1-191                 | 767                   | 4  | 5           | 4              |         | 6       | 2                         | 0.53 | 0.23        | 1.22                    |      |         |
|                        | 191+                  | 700                   | 4  | 2           | 2              |         | 7       | 2                         | 0.77 | 0.35        | 1.69                    |      |         |
| Carbaryl               | 0                     | 10822                 | 58 | 63          | 51             | 0.23    | 171     | 56                        |      |             |                         | 0.70 |         |
|                        | 1-110                 | 3603                  | 19 | 27          | 22             |         | 68      | 22                        | 1.03 | 0.77        | 1.37                    |      |         |
|                        | 110+                  | 4164                  | 22 | 33          | 27             |         | 66      | 22                        | 0.92 | 0.66        | 1.28                    |      |         |
| Carbofuran             | 0                     | 12747                 | 72 | 78          | 66             | 0.31    | 184     | 64                        |      |             |                         | 0.60 |         |
|                        | 1-120                 | 2673                  | 15 | 16          | 14             |         | 62      | 22                        | 1.34 | 1.00        | 1.80                    |      |         |
|                        | 120+                  | 2418                  | 14 | 24          | 20             |         | 40      | 14                        | 0.98 | 0.69        | 1.39                    |      |         |
| <b>Organochlorines</b> |                       |                       |    |             |                |         |         |                           |      |             |                         |      |         |
| Aldrin                 | 0                     | 15585                 | 83 | 91          | 77             | 0.30    | 229     | 75                        |      |             |                         | 0.26 |         |
|                        | 1-86                  | 1584                  | 8  | 7           | 6              |         | 46      | 15                        | 1.15 | 0.82        | 1.62                    |      |         |
|                        | 86+                   | 1529                  | 8  | 20          | 17             |         | 29      | 10                        | 0.73 | 0.48        | 1.09                    |      |         |
| Chlordane              | 0                     | 15238                 | 82 | 82          | 67             | 0.02    | 222     | 74                        |      |             |                         | 0.26 |         |
|                        | 1-55                  | 1745                  | 9  | 22          | 18             |         | 36      | 12                        | 1.11 | 0.78        | 1.60                    |      |         |
|                        | 55+                   | 1711                  | 9  | 19          | 15             |         | 42      | 14                        | 1.21 | 0.86        | 1.70                    |      |         |
| DDT                    | 0                     | 14548                 | 78 | 79          | 64             | 0.20    | 185     | 63                        |      |             |                         | 0.03 |         |
|                        | 1-104                 | 2046                  | 11 | 23          | 19             |         | 54      | 18                        | 1.33 | 0.95        | 1.85                    |      |         |
|                        | 104+                  | 2032                  | 11 | 21          | 17             |         | 56      | 19                        | 1.39 | 1.00        | 1.94                    |      |         |
| Dieldrin               | 0                     | 18060                 | 96 | 113         | 93             | 0.22    | 293     | 96                        |      |             |                         | 0.10 |         |
|                        | 1-55                  | 344                   | 2  | 3           | 2              |         | 6       | 2                         | 0.57 | 0.25        | 1.30                    |      |         |
|                        | 55+                   | 330                   | 2  | 6           | 5              |         | 6       | 2                         | 0.60 | 0.26        | 1.37                    |      |         |
| Lindane                | 0                     | 16227                 | 87 | 95          | 77             | 0.00    | 264     | 86                        |      |             |                         | 0.67 |         |
|                        | 1-96                  | 1289                  | 7  | 8           | 7              |         | 17      | 6                         | 0.66 | 0.40        | 1.09                    |      |         |
|                        | 96+                   | 1169                  | 6  | 20          | 16             |         | 26      | 8                         | 1.05 | 0.69        | 1.59                    |      |         |
| Heptachlor             | 0                     | 16585                 | 88 | 92          | 74             | 0.00    | 245     | 80                        |      |             |                         | 0.70 |         |
|                        | 1-76                  | 1117                  | 6  | 11          | 9              |         | 39      | 13                        | 1.52 | 1.06        | 2.17                    |      |         |
|                        | 76+                   | 1089                  | 6  | 22          | 18             |         | 23      | 7                         | 0.90 | 0.58        | 1.41                    |      |         |



| Exposure         | Controls<br>(N=19263)<br>n % | Atopic asthma (N=127) |     |             |                |          | p-trend | Non-atopic asthma (N=314) |     |             |                |          | p-trend |
|------------------|------------------------------|-----------------------|-----|-------------|----------------|----------|---------|---------------------------|-----|-------------|----------------|----------|---------|
|                  |                              | n                     | %   | Odds Ratio* | 95% Confidence | Interval |         | n                         | %   | Odds Ratio* | 95% Confidence | Interval |         |
| Toxaphene        | 0<br>16692<br>89             | 106                   | 86. | 1.12        | 0.56           | 2.24     | 0.77    | 265                       | 88. | 0.91        | 0.56           | 1.46     | 0.39    |
|                  | 1-86<br>1022<br>5            | 9                     | 7   | 1.07        | 0.53           | 2.17     |         | 19                        | 6   | 0.82        | 0.50           | 1.34     |         |
|                  | 86+<br>1069<br>6             | 9                     | 7   | 1.07        | 0.53           | 2.17     |         | 18                        | 6   | 0.82        | 0.50           | 1.34     |         |
| Organophosphates |                              |                       |     |             |                |          |         |                           |     |             |                |          |         |
| Chlorpyrifos     | 0<br>10237<br>58             | 62                    | 53. | 1.02        | 0.63           | 1.64     | 0.16    | 155                       | 55. | 1.13        | 0.85           | 1.52     | 0.40    |
|                  | 1-141<br>3917<br>22          | 24                    | 21  | 1.40        | 0.90           | 2.18     |         | 67                        | 24  | 1.11        | 0.82           | 1.51     |         |
|                  | 141+<br>3614<br>20           | 30                    | 26  | 1.40        | 0.90           | 2.18     | 0.00    | 59                        | 21  | 1.11        | 0.82           | 1.51     | 0.64    |
| Coumaphos        | 0<br>16114<br>91             | 92                    | 79. | 1.18        | 0.51           | 2.71     |         | 259                       | 91. | 0.96        | 0.56           | 1.66     | 0.64    |
|                  | 1-116<br>818<br>5            | 6                     | 5   | 3.81        | 2.28           | 6.37     |         | 14                        | 5   | 0.87        | 0.49           | 1.57     |         |
|                  | 116+<br>767<br>4             | 18                    | 16  | 3.81        | 2.28           | 6.37     | 0.07    | 12                        | 4   | 0.87        | 0.49           | 1.57     | 0.83    |
| Diazinon         | 0<br>14899<br>80             | 87                    | 71. | 1.66        | 1.00           | 2.75     |         | 239                       | 78. | 1.25        | 0.88           | 1.76     | 0.83    |
|                  | 1-93<br>1855<br>10           | 19                    | 15  | 1.45        | 0.84           | 2.50     |         | 40                        | 13  | 0.86        | 0.58           | 1.29     |         |
|                  | 93+<br>1907<br>10            | 17                    | 14  | 1.45        | 0.84           | 2.50     | 0.07    | 29                        | 9   | 0.86        | 0.58           | 1.29     | 0.40    |
| Dichlorvos       | 0<br>15905<br>89             | 98                    | 82. | 1.30        | 0.65           | 2.61     |         | 249                       | 87. | 0.89        | 0.53           | 1.49     | 0.40    |
|                  | 1-208<br>1019<br>6           | 9                     | 8   | 1.75        | 0.94           | 3.23     |         | 16                        | 6   | 1.29        | 0.83           | 2.00     |         |
|                  | 208+<br>1011<br>6            | 12                    | 10  | 1.75        | 0.94           | 3.23     | 0.10    | 23                        | 8   | 1.29        | 0.83           | 2.00     | 0.09    |
| Fonofos          | 0<br>14060<br>78             | 82                    | 71. | 1.15        | 0.65           | 2.04     |         | 207                       | 71. | 1.18        | 0.83           | 1.68     | 0.09    |
|                  | 1-145<br>2065<br>12          | 15                    | 13  | 1.57        | 0.93           | 2.64     |         | 40                        | 14  | 1.32        | 0.94           | 1.86     |         |
|                  | 145+<br>1901<br>11           | 19                    | 16  | 1.57        | 0.93           | 2.64     | 0.09    | 43                        | 15  | 1.32        | 0.94           | 1.86     | 0.04    |
| Malathion        | 0<br>6755<br>36              | 39                    | 32. | 0.79        | 0.49           | 1.28     |         | 81                        | 27. | 1.36        | 1.01           | 1.83     | 0.04    |
|                  | 1-110<br>5949<br>32          | 30                    | 24  | 1.41        | 0.93           | 2.14     |         | 109                       | 36  | 1.36        | 1.02           | 1.83     |         |
|                  | 110+<br>5845<br>32           | 55                    | 44  | 1.41        | 0.93           | 2.14     | 0.01    | 114                       | 38  | 1.36        | 1.02           | 1.83     | 0.90    |
| Parathion        | 0<br>17215<br>92             | 103                   | 84. | 2.21        | 1.13           | 4.34     |         | 279                       | 91. | 1.31        | 0.79           | 2.18     | 0.90    |
|                  | 1-125<br>694<br>4            | 10                    | 8   | 2.13        | 1.04           | 4.37     |         | 17                        | 6   | 0.90        | 0.48           | 1.67     |         |
|                  | 125+<br>719<br>4             | 9                     | 7   | 2.13        | 1.04           | 4.37     | 0.29    | 11                        | 4   | 0.90        | 0.48           | 1.67     | 0.22    |
| Phorate          | 0<br>13079<br>70             | 76                    | 62. | 1.13        | 0.68           | 1.85     |         | 181                       | 60. | 1.40        | 1.04           | 1.89     | 0.22    |
|                  | 1-108<br>2902<br>16          | 22                    | 18  | 1.29        | 0.80           | 2.08     |         | 68                        | 23  | 1.13        | 0.82           | 1.56     |         |
|                  | 108+<br>2717<br>15           | 24                    | 20  | 1.29        | 0.80           | 2.08     |         | 52                        | 17  | 1.13        | 0.82           | 1.56     |         |

| Exposure                    | Controls<br>(N=19263)<br>n % | Atopic asthma (N=127) |     |             |                |                | p-trend | Non-atopic asthma (N=314) |      |             |                         |  | p-trend |      |
|-----------------------------|------------------------------|-----------------------|-----|-------------|----------------|----------------|---------|---------------------------|------|-------------|-------------------------|--|---------|------|
|                             |                              | n                     | %   | Odds Ratio* | 95% Confidence | 95% Confidence |         | n                         | %    | Odds Ratio* | 95% Confidence Interval |  |         |      |
| <b>Terbufos</b>             |                              |                       |     |             |                |                |         |                           |      |             |                         |  |         |      |
| 0                           | 10936                        | 61                    | 59. |             |                |                | 162     | 56.                       |      |             |                         |  |         | 0.33 |
| 1-189                       | 3639                         | 20                    | 22  | 1.08        | 0.68           | 1.72           | 66      | 23                        | 1.16 | 0.86        | 1.56                    |  |         |      |
| 189+                        | 3395                         | 19                    | 20  | 1.00        | 0.62           | 1.63           | 61      | 21                        | 1.14 | 0.84        | 1.54                    |  |         |      |
| <b>Pyrethroids</b>          |                              |                       |     |             |                |                |         |                           |      |             |                         |  |         |      |
| <b>Permethrin (animals)</b> |                              |                       |     |             |                |                |         |                           |      |             |                         |  |         |      |
| 0                           | 15784                        | 87                    | 82. |             |                |                | 261     | 89.                       |      |             |                         |  |         | 0.75 |
| 1-119                       | 1208                         | 7                     | 7   | 1.14        | 0.55           | 2.38           | 15      | 5                         | 0.82 | 0.48        | 1.40                    |  |         |      |
| 119+                        | 1105                         | 6                     | 11  | 1.99        | 1.10           | 3.60           | 17      | 6                         | 0.99 | 0.60        | 1.64                    |  |         |      |
| <b>Permethrin (crops)</b>   |                              |                       |     |             |                |                |         |                           |      |             |                         |  |         |      |
| 0                           | 15558                        | 87                    | 83. |             |                |                | 245     | 85.                       |      |             |                         |  |         | 0.15 |
| 1-83                        | 1196                         | 7                     | 10  | 1.60        | 0.85           | 3.01           | 25      | 9                         | 1.44 | 0.95        | 2.20                    |  |         |      |
| 83+                         | 1041                         | 6                     | 8   | 1.60        | 0.79           | 3.24           | 17      | 6                         | 1.23 | 0.74        | 2.04                    |  |         |      |
| <b>Fungicides</b>           |                              |                       |     |             |                |                |         |                           |      |             |                         |  |         |      |
| <b>Benomyl</b>              |                              |                       |     |             |                |                |         |                           |      |             |                         |  |         |      |
| 0                           | 17345                        | 93                    | 93. |             |                |                | 283     | 94.                       |      |             |                         |  |         | 0.40 |
| 1-145                       | 771                          | 4                     | 4   | 0.95        | 0.38           | 2.41           | 12      | 4                         | 0.93 | 0.51        | 1.70                    |  |         |      |
| 145+                        | 611                          | 3                     | 2   | 0.75        | 0.23           | 2.44           | 7       | 2                         | 0.71 | 0.33        | 1.55                    |  |         |      |
| <b>Captan</b>               |                              |                       |     |             |                |                |         |                           |      |             |                         |  |         |      |
| 0                           | 15991                        | 91                    | 82. |             |                |                | 260     | 92.                       |      |             |                         |  |         | 0.72 |
| 1-172                       | 1279                         | 7                     | 14  | 2.08        | 1.21           | 3.56           | 14      | 5                         | 0.66 | 0.38        | 1.14                    |  |         |      |
| 172+                        | 351                          | 2                     | 4   | 2.23        | 0.89           | 5.60           | 8       | 3                         | 1.37 | 0.67        | 2.83                    |  |         |      |
| <b>Chlorothalonil</b>       |                              |                       |     |             |                |                |         |                           |      |             |                         |  |         |      |
| 0                           | 17629                        | 93                    | 95. |             |                |                | 287     | 94.                       |      |             |                         |  |         | 0.91 |
| 1-203                       | 657                          | 3                     | 2   | 0.69        | 0.22           | 2.23           | 13      | 4                         | 1.36 | 0.76        | 2.43                    |  |         |      |
| 203+                        | 658                          | 3                     | 2   | 0.71        | 0.22           | 2.30           | 7       | 2                         | 0.78 | 0.36        | 1.70                    |  |         |      |
| <b>Maneb/Mancozeb</b>       |                              |                       |     |             |                |                |         |                           |      |             |                         |  |         |      |
| 0                           | 17350                        | 93                    | 92. |             |                |                | 284     | 93.                       |      |             |                         |  |         | 0.85 |
| 1-176                       | 752                          | 4                     | 5   | 1.34        | 0.56           | 3.19           | 9       | 3                         | 0.75 | 0.38        | 1.50                    |  |         |      |
| 176+                        | 649                          | 3                     | 3   | 1.04        | 0.37           | 2.95           | 11      | 4                         | 1.04 | 0.55        | 1.97                    |  |         |      |
| <b>Metalaxyl</b>            |                              |                       |     |             |                |                |         |                           |      |             |                         |  |         |      |
| 0                           | 15240                        | 82                    | 82. |             |                |                | 257     | 85.                       |      |             |                         |  |         | 0.66 |
| 1-91                        | 1640                         | 9                     | 11  | 1.30        | 0.72           | 2.37           | 25      | 8                         | 0.96 | 0.63        | 1.47                    |  |         |      |
| 91+                         | 1751                         | 9                     | 8   | 0.97        | 0.45           | 2.07           | 22      | 7                         | 0.90 | 0.55        | 1.47                    |  |         |      |

| Exposure<br>Fumigants<br>80/20 mix | Controls<br>(N=19263)<br>n<br>% | Atopic asthma (N=127) |    |             |                | p-trend | Non-atopic asthma (N=314) |      |             |                         | p-trend |
|------------------------------------|---------------------------------|-----------------------|----|-------------|----------------|---------|---------------------------|------|-------------|-------------------------|---------|
|                                    |                                 | n                     | %  | Odds Ratio* | 95% Confidence |         | n                         | %    | Odds Ratio* | 95% Confidence Interval |         |
| Aluminum Phosphide                 | 0                               | 18055                 | 96 | 112         | 88.            | 282     | 93.                       | 1.52 | 0.92        | 2.52                    | 0.72    |
|                                    | 1-55                            | 479                   | 3  | 6           | 5              | 17      | 6                         | 0.44 | 0.14        | 1.38                    |         |
|                                    | 55+                             | 293                   | 2  | 9           | 7              | 3       | 1                         | 0.44 | 0.14        | 1.38                    |         |
|                                    | 0                               | 18248                 | 97 | 120         | 95.            | 293     | 97.                       | 1.04 | 0.49        | 2.24                    |         |
|                                    | 1-41                            | 383                   | 2  | 4           | 3              | 7       | 2                         | 0.85 | 0.27        | 2.69                    |         |
| Ethylene Dibromide                 | 41+                             | 238                   | 1  | 2           | 2              | 3       | 1                         | 1.29 | 0.31        | 5.28                    | 0.57    |
|                                    | 0                               | 18063                 | 96 | 116         | 92.            | 291     | 95.                       | 1.11 | 0.51        | 2.41                    |         |
|                                    | 1-76                            | 406                   | 2  | 4           | 3              | 7       | 2                         | 1.24 | 0.56        | 2.72                    |         |
| Methyl bromide                     | 76+                             | 372                   | 2  | 6           | 5              | 7       | 2                         | 2.85 | 1.17        | 6.94                    | 0.62    |
|                                    | 0                               | 16257                 | 86 | 111         | 87.            | 268     | 88.                       | 1.06 | 0.64        | 1.74                    |         |
|                                    | 1-101                           | 1324                  | 7  | 9           | 7              | 20      | 7                         | 0.84 | 0.48        | 1.46                    |         |
|                                    | 101+                            | 1340                  | 7  | 7           | 6              | 17      | 6                         | 0.78 | 0.33        | 1.82                    |         |

\*Odds ratios adjusted for age, state, smoking, HPPEE, and BMI



Table E2:

Odds Ratios for specific pesticides and atopy, atopic asthma, and non-atopic asthma among 19,611 male farmers in the Agricultural Health Study

| Exposure            | Controls<br>(N=17,314) |            | Atopy Alone (N=1856)<br>95% |      |        |                     | Atopic Asthma (N=127)<br>95% |      |        |                     | Non-atopic Asthma (N=314)<br>95% |      |        |                     |      |      |      |      |      |
|---------------------|------------------------|------------|-----------------------------|------|--------|---------------------|------------------------------|------|--------|---------------------|----------------------------------|------|--------|---------------------|------|------|------|------|------|
|                     | n                      | %          | n                           | %    | Ratio* | Confidence Interval | n                            | %    | Ratio* | Confidence Interval | n                                | %    | Ratio* | Confidence Interval |      |      |      |      |      |
| <b>Herbicides</b>   | 2,4,5-T                | 3136       | 19                          | 403  | 22     | 1.32                | 1.17                         | 1.49 | 38     | 31                  | 1.48                             | 0.99 | 2.21   | 88                  | 29   | 1.24 | 0.95 | 1.61 |      |
|                     | 2,4,5-TP               | 787        | 5                           | 131  | 7      | 1.52                | 1.25                         | 1.85 | 13     | 11                  | 2.01                             | 1.12 | 3.62   | 23                  | 8    | 1.30 | 0.84 | 2.01 |      |
|                     | 2,4-D                  | 13523      | 79                          | 1467 | 80     | 1.22                | 1.07                         | 1.38 | 110    | 87                  | 1.59                             | 0.92 | 2.73   | 264                 | 85   | 1.21 | 0.88 | 1.67 |      |
|                     | Alachlor               | 9202       | 56                          | 974  | 55     | 1.01                | 0.91                         | 1.11 | 69     | 57                  | 0.92                             | 0.64 | 1.34   | 180                 | 62   | 1.15 | 0.90 | 1.47 |      |
|                     | Atrazine               | 12663      | 74                          | 1306 | 71     | 0.95                | 0.85                         | 1.07 | 94     | 75                  | 0.95                             | 0.62 | 1.45   | 241                 | 78   | 1.12 | 0.84 | 1.48 |      |
|                     | Butylate               | 4536       | 27                          | 499  | 27     | 1.08                | 0.97                         | 1.21 | 42     | 33                  | 1.24                             | 0.84 | 1.83   | 96                  | 31   | 1.11 | 0.86 | 1.43 |      |
|                     | Chlorimuron-ethyl      | 5473       | 32                          | 620  | 34     | 1.08                | 0.98                         | 1.20 | 45     | 36                  | 1.22                             | 0.84 | 1.76   | 99                  | 32   | 1.06 | 0.83 | 1.36 |      |
|                     | Cyanazine              | 7110       | 44                          | 700  | 40     | 1.01                | 0.90                         | 1.13 | 58     | 49                  | 1.14                             | 0.77 | 1.70   | 149                 | 51   | 1.24 | 0.96 | 1.60 |      |
|                     | Dicamba                | 8688       | 53                          | 880  | 50     | 1.10                | 0.98                         | 1.23 | 71     | 59                  | 1.20                             | 0.79 | 1.82   | 173                 | 61   | 1.29 | 0.98 | 1.70 |      |
|                     | EPTC                   | 3261       | 20                          | 338  | 20     | 1.04                | 0.92                         | 1.19 | 35     | 29                  | 1.61                             | 1.06 | 2.44   | 71                  | 25   | 1.25 | 0.95 | 1.66 |      |
|                     | Glyphosate             | 13181      | 77                          | 1539 | 84     | 1.39                | 1.22                         | 1.58 | 104    | 82                  | 1.40                             | 0.89 | 2.22   | 247                 | 79   | 1.18 | 0.89 | 1.55 |      |
|                     | Imazethapyr            | 7314       | 45                          | 693  | 40     | 0.98                | 0.87                         | 1.10 | 52     | 44                  | 0.97                             | 0.64 | 1.48   | 123                 | 43   | 0.88 | 0.67 | 1.14 |      |
|                     | Metolachlor            | 7785       | 48                          | 797  | 45     | 0.97                | 0.88                         | 1.08 | 58     | 48                  | 0.99                             | 0.68 | 1.44   | 148                 | 51   | 1.12 | 0.88 | 1.43 |      |
|                     | Metribuzin             | 6477       | 38                          | 671  | 37     | 1.06                | 0.95                         | 1.18 | 55     | 44                  | 1.17                             | 0.79 | 1.71   | 127                 | 42   | 1.01 | 0.79 | 1.30 |      |
| Paraquat            | 2654                   | 16         | 401                         | 22   | 1.21   | 1.07                | 1.38                         | 28   | 22     | 1.70                | 1.07                             | 2.70 | 40     | 13                  | 0.84 | 0.59 | 1.20 |      |      |
| Pendimethalin       | 6389                   | 38         | 678                         | 37   | 0.94   | 0.85                | 1.04                         | 44   | 35     | 0.93                | 0.64                             | 1.35 | 120    | 39                  | 1.13 | 0.90 | 1.43 |      |      |
| Petroleum Oil       | 3496                   | 21         | 419                         | 23   | 1.16   | 1.03                | 1.30                         | 33   | 27     | 1.30                | 0.86                             | 1.95 | 84     | 28                  | 1.37 | 1.05 | 1.77 |      |      |
| Trifluralin         | 8937                   | 55         | 988                         | 57   | 1.25   | 1.12                | 1.39                         | 62   | 53     | 0.81                | 0.55                             | 1.19 | 164    | 55                  | 0.91 | 0.71 | 1.16 |      |      |
| <b>Insecticides</b> | <b>Carbamates</b>      | Aldicarb   | 1314                        | 8    | 188    | 10                  | 0.99                         | 0.83 | 1.18   | 7                   | 6                                | 0.79 | 0.35   | 1.79                | 14   | 5    | 0.66 | 0.37 | 1.17 |
|                     |                        | Carbaryl   | 7079                        | 42   | 969    | 53                  | 1.36                         | 1.22 | 1.52   | 63                  | 50                               | 1.29 | 0.88   | 1.90                | 140  | 45   | 1.01 | 0.79 | 1.30 |
|                     |                        | Carbofuran | 4727                        | 29   | 516    | 30                  | 1.00                         | 0.90 | 1.12   | 42                  | 35                               | 1.10 | 0.75   | 1.61                | 106  | 37   | 1.17 | 0.91 | 1.49 |
|                     | <b>Organochlorines</b> | Aldrin     | 2926                        | 17   | 305    | 17                  | 1.13                         | 0.98 | 1.30   | 33                  | 27                               | 1.21 | 0.78   | 1.88                | 79   | 26   | 0.96 | 0.72 | 1.28 |
|                     |                        | Chlordane  | 3099                        | 18   | 477    | 26                  | 1.50                         | 1.33 | 1.68   | 42                  | 34                               | 1.85 | 1.24   | 2.74                | 86   | 28   | 1.27 | 0.98 | 1.66 |
|                     |                        | DDT        | 3841                        | 23   | 473    | 26                  | 1.25                         | 1.10 | 1.43   | 47                  | 37                               | 1.46 | 0.95   | 2.22                | 124  | 40   | 1.44 | 1.11 | 1.88 |
|                     |                        | Dieldrin   | 616                         | 4    | 82     | 5                   | 1.37                         | 1.07 | 1.75   | 10                  | 8                                | 1.53 | 0.78   | 3.02                | 13   | 4    | 0.64 | 0.36 | 1.13 |
|                     |                        | Heptachlor | 2070                        | 12   | 205    | 11                  | 1.08                         | 0.92 | 1.27   | 34                  | 27                               | 2.03 | 1.31   | 3.14                | 64   | 21   | 1.21 | 0.90 | 1.63 |
|                     |                        | Lindane    | 2222                        | 13   | 296    | 16                  | 1.27                         | 1.11 | 1.46   | 28                  | 23                               | 1.60 | 1.04   | 2.47                | 44   | 14   | 0.86 | 0.62 | 1.20 |
|                     |                        | Toxaphene  | 1880                        | 11   | 257    | 14                  | 1.19                         | 1.03 | 1.38   | 18                  | 15                               | 1.09 | 0.65   | 1.83                | 43   | 14   | 0.99 | 0.71 | 1.38 |

| Exposure                | Controls<br>(N=17,314) |    | Atopy Alone (N=1856)<br>95% |    |             |                     | Atopic Asthma (N=127)<br>95% |    |             |                     | Non-atopic Asthma (N=314)<br>95% |      |             |                     |      |      |      |
|-------------------------|------------------------|----|-----------------------------|----|-------------|---------------------|------------------------------|----|-------------|---------------------|----------------------------------|------|-------------|---------------------|------|------|------|
|                         | n                      | %  | n                           | %  | Odds Ratio* | Confidence Interval | n                            | %  | Odds Ratio* | Confidence Interval | n                                | %    | Odds Ratio* | Confidence Interval |      |      |      |
| <b>Organophosphates</b> |                        |    |                             |    |             |                     |                              |    |             |                     |                                  |      |             |                     |      |      |      |
| Chlorpyrifos            | 7218                   | 42 | 783                         | 43 | 1.02        | 0.92                | 1.12                         | 60 | 48          | 1.27                | 0.89                             | 1.81 | 135         | 43                  | 1.08 | 0.86 | 1.36 |
| Counmaphos              | 1451                   | 9  | 187                         | 11 | 1.21        | 1.03                | 1.42                         | 24 | 21          | 2.39                | 1.51                             | 3.77 | 26          | 9                   | 0.90 | 0.59 | 1.35 |
| Diazinon                | 3324                   | 20 | 547                         | 30 | 1.54        | 1.38                | 1.73                         | 38 | 30          | 1.65                | 1.10                             | 2.47 | 70          | 23                  | 1.08 | 0.82 | 1.43 |
| Dichlorvos              | 1861                   | 12 | 224                         | 13 | 1.23        | 1.06                | 1.44                         | 21 | 18          | 1.50                | 0.92                             | 2.44 | 39          | 14                  | 1.07 | 0.75 | 1.51 |
| Fonofos                 | 3737                   | 23 | 325                         | 19 | 0.85        | 0.75                | 0.97                         | 37 | 31          | 1.41                | 0.93                             | 2.13 | 84          | 29                  | 1.21 | 0.92 | 1.58 |
| Malathion               | 10822                  | 64 | 1276                        | 70 | 1.30        | 1.17                | 1.45                         | 87 | 69          | 1.10                | 0.75                             | 1.62 | 229         | 74                  | 1.38 | 1.06 | 1.79 |
| Parathion               | 1299                   | 8  | 194                         | 11 | 1.18        | 1.00                | 1.39                         | 19 | 16          | 2.09                | 1.23                             | 3.52 | 30          | 10                  | 1.14 | 0.76 | 1.70 |
| Phorate                 | 5227                   | 31 | 529                         | 29 | 1.03        | 0.92                | 1.15                         | 48 | 39          | 1.23                | 0.84                             | 1.81 | 126         | 41                  | 1.29 | 1.01 | 1.65 |
| Terbufos                | 6575                   | 40 | 617                         | 35 | 0.86        | 0.77                | 0.96                         | 51 | 43          | 1.03                | 0.71                             | 1.51 | 132         | 45                  | 1.14 | 0.90 | 1.46 |
| <b>Pyrethroids</b>      |                        |    |                             |    |             |                     |                              |    |             |                     |                                  |      |             |                     |      |      |      |
| Permethrin (animal)     | 2097                   | 13 | 261                         | 15 | 1.24        | 1.07                | 1.43                         | 21 | 18          | 1.54                | 0.94                             | 2.50 | 33          | 11                  | 0.93 | 0.64 | 1.35 |
| Permethrin (Crop)       | 2089                   | 13 | 227                         | 13 | 0.91        | 0.78                | 1.05                         | 20 | 18          | 1.50                | 0.92                             | 2.46 | 42          | 15                  | 1.27 | 0.90 | 1.77 |
| <b>Fungicides</b>       |                        |    |                             |    |             |                     |                              |    |             |                     |                                  |      |             |                     |      |      |      |
| Benomyl                 | 1302                   | 8  | 212                         | 12 | 1.20        | 1.02                | 1.42                         | 10 | 8           | 0.99                | 0.50                             | 1.98 | 22          | 7                   | 0.88 | 0.55 | 1.40 |
| Captan                  | 1685                   | 11 | 259                         | 15 | 1.40        | 1.22                | 1.62                         | 22 | 19          | 1.91                | 1.19                             | 3.05 | 29          | 10                  | 0.92 | 0.62 | 1.35 |
| Chlorothalonil          | 1227                   | 7  | 193                         | 11 | 1.17        | 0.98                | 1.39                         | 6  | 5           | 0.66                | 0.28                             | 1.54 | 22          | 7                   | 1.13 | 0.70 | 1.80 |
| Maneb/Mancozeb          | 1314                   | 8  | 206                         | 11 | 1.15        | 0.97                | 1.36                         | 13 | 11          | 1.43                | 0.75                             | 2.72 | 20          | 7                   | 0.82 | 0.50 | 1.34 |
| Metaxyl                 | 3217                   | 19 | 450                         | 25 | 1.10        | 0.97                | 1.26                         | 26 | 21          | 1.28                | 0.78                             | 2.09 | 50          | 16                  | 0.90 | 0.64 | 1.26 |
| <b>Fumigants</b>        |                        |    |                             |    |             |                     |                              |    |             |                     |                                  |      |             |                     |      |      |      |
| 80/20 mix               | 712                    | 4  | 101                         | 6  | 1.35        | 1.09                | 1.68                         | 15 | 12          | 2.22                | 1.27                             | 3.88 | 24          | 8                   | 1.29 | 0.84 | 1.99 |
| Aluminum Phosphide      | 562                    | 3  | 75                          | 4  | 1.15        | 0.90                | 1.48                         | 6  | 5           | 1.36                | 0.59                             | 3.11 | 12          | 4                   | 1.15 | 0.64 | 2.07 |
| Ethylene Dibromide      | 701                    | 4  | 116                         | 6  | 1.16        | 0.94                | 1.44                         | 10 | 8           | 2.10                | 1.04                             | 4.27 | 16          | 5                   | 1.27 | 0.74 | 2.18 |
| Methyl Bromide          | 2463                   | 14 | 359                         | 20 | 1.06        | 0.92                | 1.23                         | 16 | 13          | 0.87                | 0.46                             | 1.61 | 41          | 13                  | 0.98 | 0.66 | 1.46 |

\*Odds ratios adjusted for age, state, smoking, HPEE and BMI.



Table E3 Odds ratios for specific pesticides and atopic and non-atopic asthma among 18,569 male farmers in the Agricultural Health Study excluding individuals with chronic bronchitis or farmer's lung

| Exposure          | Controls<br>(N=18,283)<br>n % | Atopic asthma (N=82) |             |             |                         | Non-atopic asthma (N=204) |      |             |                         |      |      |      |      |      |      |
|-------------------|-------------------------------|----------------------|-------------|-------------|-------------------------|---------------------------|------|-------------|-------------------------|------|------|------|------|------|------|
|                   |                               | n                    | %           | Odds Ratio* | 95% Confidence Interval | n                         | %    | Odds Ratio* | 95% Confidence Interval |      |      |      |      |      |      |
| <b>Herbicides</b> | 2,4,5-T                       | 3315                 | 19          | 27          | 34                      | 1.76                      | 1.08 | 2.85        | 44                      | 22   | 0.90 | 0.63 | 1.27 |      |      |
|                   | 2,4,5-TP                      | 861                  | 5           | 7           | 9                       | 1.69                      | 0.77 | 3.70        | 11                      | 6    | 0.95 | 0.51 | 1.76 |      |      |
|                   | 2,4-D                         | 14242                | 79          | 73          | 89                      | 1.96                      | 0.96 | 3.99        | 171                     | 84   | 1.17 | 0.79 | 1.72 |      |      |
|                   | Alachlor                      | 9646                 | 56          | 45          | 57                      | 0.98                      | 0.62 | 1.54        | 119                     | 63   | 1.25 | 0.92 | 1.69 |      |      |
|                   | Atrazine                      | 13273                | 73          | 61          | 74                      | 0.98                      | 0.59 | 1.65        | 157                     | 78   | 1.20 | 0.84 | 1.70 |      |      |
|                   | Butylate                      | 4761                 | 27          | 25          | 31                      | 1.15                      | 0.71 | 1.88        | 56                      | 28   | 0.96 | 0.70 | 1.32 |      |      |
|                   | Chlorimuron-ethyl             | 5756                 | 32          | 27          | 33                      | 1.13                      | 0.70 | 1.80        | 71                      | 36   | 1.24 | 0.92 | 1.66 |      |      |
|                   | Cyanazine                     | 7391                 | 43          | 38          | 49                      | 1.25                      | 0.76 | 2.05        | 95                      | 51   | 1.27 | 0.92 | 1.74 |      |      |
|                   | Dicamba                       | 9048                 | 53          | 43          | 55                      | 1.07                      | 0.64 | 1.79        | 105                     | 57   | 1.13 | 0.81 | 1.59 |      |      |
|                   | EPTC                          | 3402                 | 20          | 22          | 29                      | 1.63                      | 0.97 | 2.74        | 47                      | 26   | 1.32 | 0.93 | 1.87 |      |      |
|                   | <b>Insecticides</b>           | Glyphosate           | 14043       | 77          | 66                      | 81                        | 1.28 | 0.73        | 2.23                    | 164  | 80   | 1.28 | 0.90 | 1.82 |      |
|                   |                               |                      | Imazethapyr | 7625        | 45                      | 30                        | 40   | 0.80        | 0.48                    | 1.35 | 81   | 43   | 0.89 | 0.64 | 1.24 |
|                   |                               |                      | Metolachlor | 8155        | 47                      | 39                        | 51   | 1.16        | 0.73                    | 1.84 | 95   | 51   | 1.15 | 0.85 | 1.55 |
|                   |                               | Metribuzin           | 6760        | 38          | 34                      | 43                        | 1.14 | 0.70        | 1.83                    | 83   | 42   | 1.04 | 0.77 | 1.41 |      |
|                   |                               |                      | Paraquat    | 2901        | 16                      | 15                        | 19   | 1.36        | 0.74                    | 2.51 | 22   | 11   | 0.68 | 0.42 | 1.09 |
|                   |                               | Pendimethalin        | 6728        | 37          | 30                      | 37                        | 1.05 | 0.67        | 1.66                    | 81   | 41   | 1.21 | 0.91 | 1.62 |      |
| Petroleum Oil     |                               | 3702                 | 21          | 22          | 28                      | 1.43                      | 0.87 | 2.36        | 48                      | 24   | 1.15 | 0.82 | 1.60 |      |      |
| Trifluralin       |                               | 9420                 | 55          | 37          | 48                      | 0.69                      | 0.43 | 1.11        | 101                     | 53   | 0.82 | 0.61 | 1.11 |      |      |
| <b>Carbamates</b> |                               | Aldicarb             | 1431        | 8           | 5                       | 6                         | 0.92 | 0.35        | 2.45                    | 9    | 5    | 0.65 | 0.32 | 1.32 |      |
|                   |                               | Carbaryl             | 7611        | 42          | 38                      | 47                        | 1.13 | 0.70        | 1.83                    | 92   | 46   | 1.06 | 0.78 | 1.44 |      |
|                   | Carbofuran                    | 4932                 | 29          | 23          | 29                      | 0.90                      | 0.55 | 1.47        | 64                      | 35   | 1.14 | 0.84 | 1.55 |      |      |
|                   | Organochlorines               | Aldrin               | 3023        | 17          | 19                      | 24                        | 1.06 | 0.60        | 1.86                    | 44   | 22   | 0.85 | 0.59 | 1.23 |      |
|                   |                               | Chlordane            | 3354        | 19          | 21                      | 27                        | 1.27 | 0.75        | 2.15                    | 53   | 27   | 1.23 | 0.88 | 1.71 |      |
|                   |                               | DDT                  | 4038        | 23          | 29                      | 36                        | 1.35 | 0.80        | 2.29                    | 71   | 36   | 1.26 | 0.90 | 1.76 |      |
|                   |                               | Dieldrin             | 656         | 4           | 6                       | 8                         | 1.43 | 0.60        | 3.40                    | 5    | 3    | 0.39 | 0.16 | 0.96 |      |
|                   | Heptachlor                    | 2115                 | 12          | 16          | 20                      | 1.30                      | 0.72 | 2.34        | 31                      | 16   | 0.91 | 0.60 | 1.36 |      |      |
|                   | Lindane                       | 2354                 | 13          | 13          | 17                      | 1.10                      | 0.60 | 2.01        | 24                      | 12   | 0.74 | 0.48 | 1.14 |      |      |
|                   | Toxaphene                     | 2014                 | 11          | 14          | 17                      | 1.37                      | 0.75 | 2.48        | 21                      | 11   | 0.73 | 0.46 | 1.17 |      |      |

| Exposure                | Controls<br>(N=18,283) |    | Atopic asthma (N=82) |    |             |                         |     | Non-atopic asthma (N=204) |             |                         |      |  |
|-------------------------|------------------------|----|----------------------|----|-------------|-------------------------|-----|---------------------------|-------------|-------------------------|------|--|
|                         | n                      | %  | n                    | %  | Odds Ratio* | 95% Confidence Interval | n   | %                         | Odds Ratio* | 95% Confidence Interval |      |  |
| <b>Organophosphates</b> |                        |    |                      |    |             |                         |     |                           |             |                         |      |  |
| Chlorpyrifos            | 7620                   | 42 | 38                   | 46 | 1.23        | 0.79                    | 86  | 43                        | 1.05        | 0.79                    | 1.39 |  |
| Coumaphos               | 1540                   | 9  | 18                   | 24 | 2.93        | 1.72                    | 14  | 8                         | 0.76        | 0.44                    | 1.31 |  |
| Diazinon                | 3647                   | 21 | 21                   | 26 | 1.32        | 0.78                    | 44  | 22                        | 1.04        | 0.73                    | 1.48 |  |
| Dichlorvos              | 1957                   | 12 | 11                   | 14 | 1.21        | 0.63                    | 25  | 14                        | 1.09        | 0.71                    | 1.69 |  |
| Fonofos                 | 3845                   | 22 | 21                   | 27 | 1.22        | 0.72                    | 57  | 31                        | 1.39        | 1.00                    | 1.94 |  |
| Malathion               | 11424                  | 64 | 56                   | 69 | 1.15        | 0.71                    | 146 | 73                        | 1.33        | 0.97                    | 1.83 |  |
| Parathion               | 1399                   | 8  | 13                   | 16 | 2.31        | 1.22                    | 19  | 10                        | 1.16        | 0.70                    | 1.90 |  |
| Phorate                 | 5422                   | 30 | 29                   | 36 | 1.17        | 0.72                    | 84  | 42                        | 1.46        | 1.08                    | 1.97 |  |
| Terbufos                | 6818                   | 40 | 30                   | 39 | 0.93        | 0.58                    | 86  | 45                        | 1.19        | 0.89                    | 1.61 |  |
| <b>Pyrethroids</b>      |                        |    |                      |    |             |                         |     |                           |             |                         |      |  |
| Permethrin (animals)    | 2226                   | 13 | 9                    | 12 | 0.94        | 0.46                    | 19  | 10                        | 0.80        | 0.49                    | 1.29 |  |
| Permethrin (crops)      | 2200                   | 13 | 9                    | 12 | 1.01        | 0.50                    | 27  | 15                        | 1.29        | 0.85                    | 1.95 |  |
| <b>Fungicides</b>       |                        |    |                      |    |             |                         |     |                           |             |                         |      |  |
| Benomyl                 | 1444                   | 8  | 5                    | 6  | 0.71        | 0.27                    | 16  | 8                         | 1.00        | 0.58                    | 1.74 |  |
| Captan                  | 1837                   | 11 | 16                   | 22 | 2.24        | 1.28                    | 19  | 10                        | 0.91        | 0.56                    | 1.48 |  |
| Chlorothalonil          | 1371                   | 8  | 3                    | 4  | 0.48        | 0.15                    | 18  | 9                         | 1.44        | 0.84                    | 2.44 |  |
| Maneb/Mancozeb          | 1459                   | 8  | 8                    | 10 | 1.28        | 0.57                    | 13  | 7                         | 0.81        | 0.44                    | 1.49 |  |
| Metaxyl                 | 3514                   | 20 | 15                   | 19 | 1.06        | 0.56                    | 32  | 16                        | 0.86        | 0.56                    | 1.31 |  |
| <b>Fumigants</b>        |                        |    |                      |    |             |                         |     |                           |             |                         |      |  |
| 80/20 mix               | 751                    | 4  | 10                   | 12 | 2.35        | 1.18                    | 14  | 7                         | 1.22        | 0.70                    | 2.13 |  |
| Aluminum phosphide      | 594                    | 3  | 5                    | 6  | 1.88        | 0.75                    | 8   | 4                         | 1.22        | 0.60                    | 2.50 |  |
| Ethylene Dibromide      | 779                    | 4  | 7                    | 9  | 2.33        | 0.99                    | 13  | 7                         | 1.66        | 0.90                    | 3.05 |  |
| Methyl bromide          | 2712                   | 15 | 11                   | 13 | 0.96        | 0.45                    | 30  | 15                        | 1.16        | 0.72                    | 1.87 |  |

\*Odds ratios adjusted for age, state, smoking, HPEE, and BMI
